# Supplementary material for: Poly(amidoamine) Dendrimer/Camptothecin Complex: From Synthesis to In Vitro Cancer Cell Line Studies
Source: MDPI journal article supplement (doi:10.3390/molecules28062696), 2023-03-16
Supplement: s1 [file s1]

Table S1. Percentage content of carboxylic and lactone forms of CPT at pH 7.40±0.05.

| Time<br>[h] | Carboxylic form of CPT   |                | Lactone form of CPT      |                |
|-------------|--------------------------|----------------|--------------------------|----------------|
|             | Concentration<br>[ug/ml] | Content<br>[%] | Concentration<br>[ug/ml] | Content<br>[%] |
| 1.5         | 30.08                    | 83.88          | 5.78                     | 16.12          |
| 3           | 49.20                    | 86.33          | 7.65                     | 13.67          |
| 6           | 71.78                    | 88.94          | 8.43                     | 11.06          |
| 8.5         | 71.86                    | 89.10          | 8.33                     | 10.90          |
| 21          | 75.58                    | 90.64          | 6.83                     | 9.36           |
| 28          | 64.71                    | 90.17          | 6.44                     | 9.83           |
| 48          | 53.74                    | 90.09          | 5.43                     | 9.91           |
| 75          | 47.82                    | 90.04          | 4.91                     | 9.96           |
| 98          | 39.10                    | 89.77          | 4.35                     | 10.23          |
| 168         | 32.24                    | 88.56          | 4.99                     | 11.35          |
